# Supplementary material for: Tobacco Arp3 is localized to actin-nucleating sites in vivo
Source: PubMed Central journal article supplement — J Exp Bot. 2009 Jan 6;60(2):603–14. doi: 10.1093/jxb/ern307 (PMC2651461; doi:10.1093/jxb/ern307), 2009-01-06
Supplement: ern307_1.pdf [file ern307_1.pdf]

# Tobacco Arp3 is localized to actin-nucleating sites *in vivo*

**Authors:** Jan Maisch, Jindřiška Fišerová, Lukáš Fischer and Peter Nick

## Supplementary material

**Table S1:** Swiss-Prot accession numbers of ARP3 homologues from diverse organisms used for the construction of the phylogenetic tree in **Figure 1A**.

| ARP3 homologue from                             | Swiss-Prot accession number<br>( <a href="http://www.expasy.org">http://www.expasy.org</a> ) |
|-------------------------------------------------|----------------------------------------------------------------------------------------------|
| <i>Acanthamoeba castellanii</i>                 | P53490                                                                                       |
| <i>Aedes aegypti</i> (Yellow fever mosquito).   | Q16MG7                                                                                       |
| <i>Arabidopsis thaliana</i> (Thale cress)       | Q9SAF1                                                                                       |
| <i>Aspergillus terreus</i>                      | Q0CW19                                                                                       |
| <i>Bos taurus</i> (Bovine)                      | P61157                                                                                       |
| <i>Caenorhabditis briggsae</i>                  | Q61WW9                                                                                       |
| <i>Caenorhabditis elegans</i>                   | Q9N4I0                                                                                       |
| <i>Cryptococcus neoformans</i>                  | Q55UI8                                                                                       |
| <i>Dictyostelium discoideum</i>                 | Q54QJ1                                                                                       |
| <i>Drosophila melanogaster</i> (Fruit fly)      | P32392                                                                                       |
| <i>Fugu rubripes</i> (Japanese pufferfish)      | O73723                                                                                       |
| <i>Homo sapiens</i> (Human)                     | Q9P1U1                                                                                       |
| <i>Mus musculus</i> (Mouse)                     | Q641P0                                                                                       |
| <i>Neurospora crassa</i>                        | P78712                                                                                       |
| <i>Oryza sativa</i> (Rice)                      | Q6K908                                                                                       |
| <i>Physcomitrella patens</i> (Moss)             | Q0P7I1                                                                                       |
| <i>Saccharomyces cerevisiae</i> (Baker's yeast) | P47117                                                                                       |

*Schizosaccharomyces pombe* (Fission  
yeast)

P32390

*Ustilago maydis* (Smut fungus)

Q4PFS9

*Xenopus laevis* (African clawed frog)

Q801P7
